# Supplementary material for: Linked-read sequencing identifies abundant microinversions and introgression in the arboviral vector Aedes aegypti
Source: PubMed Central journal article supplement (PMC7068900; doi:10.1186/s12915-020-0757-y), 2020-03-12

**Fig S7a**

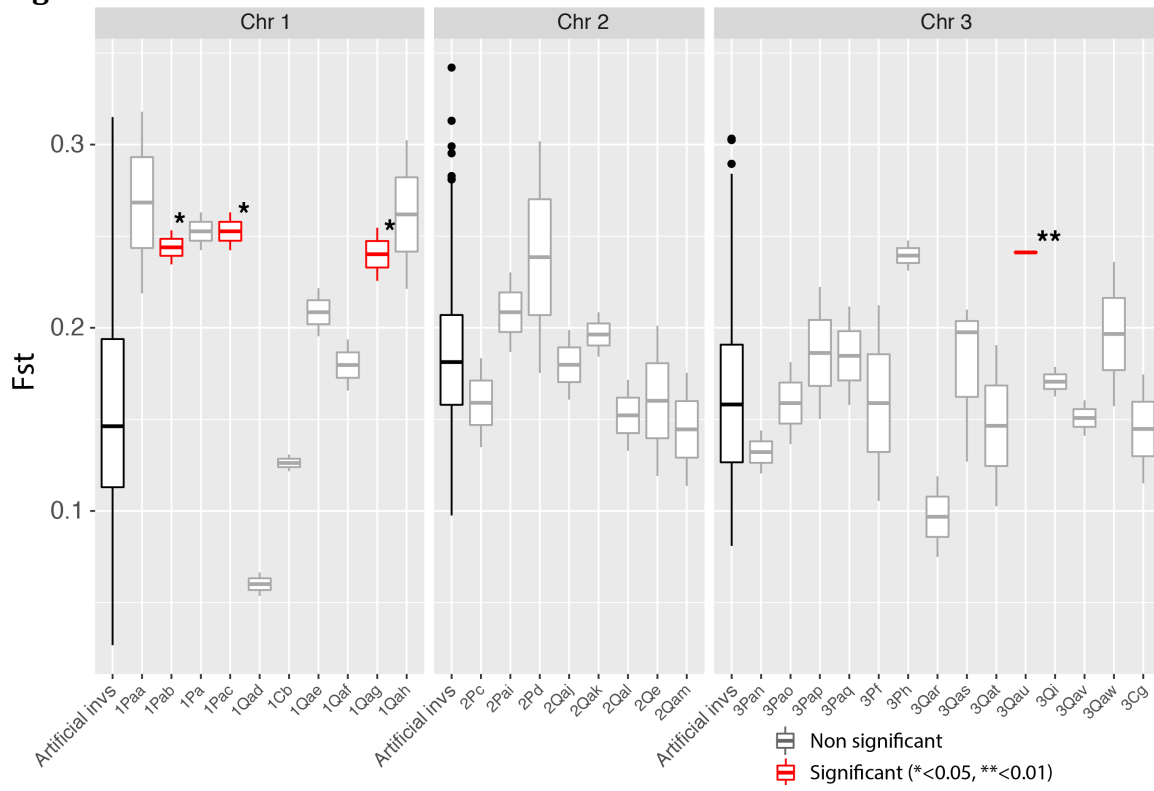

**Fig S7b**

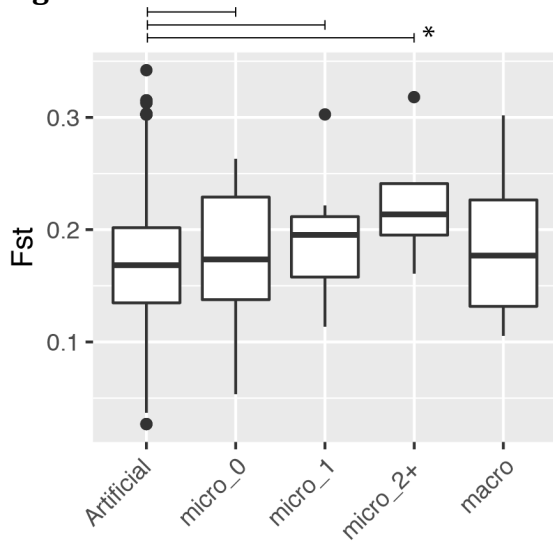

Supplement: 12915_2020_757_MOESM7_ESM.pdf [file 12915_2020_757_MOESM7_ESM.pdf]
